# Supplementary material for: Barriers to Clinical Trial Participation: Comparative Study Between Rural and Urban Participants
Source: PubMed Central journal article supplement (PMC9073606; doi:10.2196/33240), 2022-04-21
Supplement: cancer_v8i2e33240_app1.pdf [file cancer_v8i2e33240_app1.pdf]

# MCA Clinical Trials Screening Log

Record ID

---

Patient Initials

---

Patient Status

- New Patient  
 Established Patient

Cancer Site

- Brain  
 Breast  
 GI  
 GU  
 GYN  
 Head and Neck  
 Heme  
 Lung  
 Melanoma / Sarcoma

Comments

---

BRAIN

Histology

- Glioblastoma (WHO Grade IV)  
 Oligodendroglioma  
 Astrocytoma  
 Anaplastic Glioma (WHO Grade III)  
 Low Grade Glioma (WHO Grade II)  
 Meningioma  
 Other

Other\_brain\_histology

---

Stage

- New diagnosis  
 Recurrent / progression

BREAST

Histology

- DCIS  
 Invasive Carcinoma  
 Inflammatory Carcinoma

Tumor Stage

- T1  
 T2  
 T3  
 T4

Nodal status

- Negative  
 Positive

---

Metastatic  M0  
 M1

---

Recurrent / Progression  Yes  
 No

---

Stage  0  
 I  
 II  
 III  
 IV

---

Hormone Receptor Status  ER/PR + HER2 +  
 ER/PR + HER2 -  
 ER/PR - HER2 +  
 ER/PR - HER2 - (triple neg)

---

## LUNG

---

Histology  Adenocarcinoma  
 Bronchoalveolar  
 Squamous cell carcinoma  
 Small cell carcinoma  
 Mesothelimoa

---

Tumor Stage  T1  
 T2  
 T3  
 T4

---

Nodal status  N0  
 N1  
 N2  
 N3

---

Metastatic  M0  
 M1

---

Recurrent / Progression  Yes  
 No

---

Genomic / Marker Status  ALK +  
 ALK -  
 EGFR +  
 EGFR -  
 KRAS+  
 KRAS-  
 CEA elevated

---

## GU

---

Location  Renal (kidney)  
 Bladder / Ureteral  
 Prostate  
 Testes  
 Penis  
 Urethra

---

Histology

- Clear cell
- Papillary
- Transitional cell
- Small cell
- Neuroendocrine
- Adenocarcinoma
- Squamous cell
- Seminomatous
- Nonseminomatous

---

Tumor Stage

- T1
- T2
- T3
- T4

---

Nodal status

- N0
- N1
- N2
- N3

---

Metastatic

- M0
- M1

---

Recurrent / Progression

- Yes
- No

---

Genomic / Marker Status

- PSA elevated

---

GI

---

Location

- Esophagus
- Stomach
- Liver
- Gallbladder
- Pancreas
- Peritoneum
- Small Intestine
- Colon
- Rectal
- Anus
- Other GI

---

Tumor Stage

- T1
- T2
- T3
- T4

---

Nodal status

- N0
- N1
- N2
- N3

---

Metastatic

- M0
- M1

---

Recurrent / Progression

- Yes
- No

---

Stage

- I
- II
- III
- IV

---

Genomic / Marker Status

- KRAS +
- KRAS -

---

## GYN

---

Location

- Ovary
- Fallopian tubes
- Uterine cervix
- Uterine other
- Vagina
- Vulva
- Primary Peritoneal

---

Histology

- Squamous
- Adenocarcinoma
- Clear cell
- Serous
- Mucinous
- Endometrioid
- Transitional cell
- Mesenchymal
- Mixed

---

Tumor Stage

- T1
- T2
- T3
- T4

---

Nodal Status

- N0
- N1
- N2
- N3

---

Metastatic

- M0
- M1

---

Recurrent / Progression

- Yes
- No

---

Stage

- I
- II
- III
- IV

---

Genomic / Marker Status

- CA-125 elevated

---

## HEAD &amp; NECK

---

Location

- Oral cavity & pharynx
- Larynx
- Thyroid
- Nasal/Sinus
- Other

---

|           |                                                                                                                                                                                                                                                                        |
|-----------|------------------------------------------------------------------------------------------------------------------------------------------------------------------------------------------------------------------------------------------------------------------------|
| Histology | <input type="radio"/> Squamous<br><input type="radio"/> Adenocarcinoma<br><input type="radio"/> Transitional cell<br><input type="radio"/> Spindle cell<br><input type="radio"/> Keratinizing<br><input type="radio"/> Undifferentiated<br><input type="radio"/> Mixed |
|-----------|------------------------------------------------------------------------------------------------------------------------------------------------------------------------------------------------------------------------------------------------------------------------|

---

|             |                                                                                                              |
|-------------|--------------------------------------------------------------------------------------------------------------|
| Tumor Stage | <input type="radio"/> T1<br><input type="radio"/> T2<br><input type="radio"/> T3<br><input type="radio"/> T4 |
|-------------|--------------------------------------------------------------------------------------------------------------|

---

|              |                                                                                                              |
|--------------|--------------------------------------------------------------------------------------------------------------|
| Nodal Status | <input type="radio"/> N0<br><input type="radio"/> N1<br><input type="radio"/> N2<br><input type="radio"/> N3 |
|--------------|--------------------------------------------------------------------------------------------------------------|

---

|            |                                                      |
|------------|------------------------------------------------------|
| Metastatic | <input type="radio"/> M0<br><input type="radio"/> M1 |
|------------|------------------------------------------------------|

---

|                         |                                                       |
|-------------------------|-------------------------------------------------------|
| Recurrent / Progression | <input type="radio"/> Yes<br><input type="radio"/> No |
|-------------------------|-------------------------------------------------------|

---

|       |                                                                                                              |
|-------|--------------------------------------------------------------------------------------------------------------|
| Stage | <input type="radio"/> I<br><input type="radio"/> II<br><input type="radio"/> III<br><input type="radio"/> IV |
|-------|--------------------------------------------------------------------------------------------------------------|

---

HEME

---

|          |                                                                                                   |
|----------|---------------------------------------------------------------------------------------------------|
| Location | <input type="radio"/> Lymphoma<br><input type="radio"/> Leukemia<br><input type="radio"/> Myeloma |
|----------|---------------------------------------------------------------------------------------------------|

---

|           |                                                                                                                                       |
|-----------|---------------------------------------------------------------------------------------------------------------------------------------|
| Histology | <input type="radio"/> DLCL<br><input type="radio"/> Follicular<br><input type="radio"/> Hodgkins<br><input type="radio"/> Mantle Cell |
|-----------|---------------------------------------------------------------------------------------------------------------------------------------|

---

|       |                                                                                                              |
|-------|--------------------------------------------------------------------------------------------------------------|
| Stage | <input type="radio"/> I<br><input type="radio"/> II<br><input type="radio"/> III<br><input type="radio"/> IV |
|-------|--------------------------------------------------------------------------------------------------------------|

---

|                         |                                                       |
|-------------------------|-------------------------------------------------------|
| Recurrent / Progression | <input type="radio"/> Yes<br><input type="radio"/> No |
|-------------------------|-------------------------------------------------------|

---

|           |                                                                                                                                                 |
|-----------|-------------------------------------------------------------------------------------------------------------------------------------------------|
| Histology | <input type="radio"/> CLL<br><input type="radio"/> CML<br><input type="radio"/> AML<br><input type="radio"/> ALL<br><input type="radio"/> Other |
|-----------|-------------------------------------------------------------------------------------------------------------------------------------------------|

---

|                  |                                                                                  |
|------------------|----------------------------------------------------------------------------------|
| Treatment Status | <input type="radio"/> Untreated<br><input type="radio"/> Recurrent / Progression |
|------------------|----------------------------------------------------------------------------------|

---

---

Histology  Myeloma  
 Amyloidosis  
 MGUS

---

Treatment Status  Smoldering / Observation  
 Untreated  
 Recurrent / Progression

---

MELANOMA / SARCOMA

---

Histology  Melanoma  
 Osteoblastic sarcoma  
 Fibroblastic sarcoma  
 Chondroblastic sarcoma  
 Ewings sarcoma

---

Stage  Low grade stage I  
 High grade stage II  
 Metastatic stage III

---

Stage  I  
 II  
 III  
 IV

---

Recurrent / Progression  Yes  
 No

---

Nodal Status  Negative  
 Postive

---

Genomic / Marker Status  BRAF -  
 BRAF +

---

Clinic Visit Date \_\_\_\_\_  
(M-D-Y of first clinic visit for new pt)

---

Clinical Trial Available  Yes  
 No  
((based on above criteria))

---

Clinical Trial Name or Number Being considered \_\_\_\_\_

---

If patient did not meet trial eligibility, please select all that apply

- Age
- Performance Status
- Abnormal labs
- Abnormal organ function (cardiac, renal, lung, etc.)
- Pregnant/Nursing
- Other Cancer/Previous Cancer
- Uncontrolled Metastases (CNS)
- Previous Chemotherapy
- Previous Radiotherapy
- Prior Surgery
- Psychiatric Condition
- Will be Treated at another Clinic/Facility
- Inadequate tissue available (refused re-biopsy or further tissue collection)
- Other (specify)

Signed Consent

- Yes
- No

Did participant enroll on study

- Yes
- No

Reason not consented

- No Insurance
- Insurance Denial
- Time Concern
- Travel Concern
- Fear of Side Effects
- Unsure of Treatment/Clinical Trials in General
- Didn't Want to Risk Placebo
- Wanted a Different Treatment
- Family didn't want them to participate
- Study Logistics (e.g. drug ordering delay, baseline scans out of timeframe)
- Social Issues (housing, childcare)
- Language barrier
- Physician Did Not Offer (specify in notes)
- Did not meet Trial Eligibility

Physician did not offer

\_\_\_\_\_

Other reasons not consented

\_\_\_\_\_
